# Supplementary material for: Sirtuin 3 Plays a Critical Role in the Antidepressant- and Anxiolytic-like Effects of Kaempferol
Source: MDPI journal article supplement (doi:10.3390/antiox11101886), 2022-09-23
Supplement: s1 [file s1]

**Table S1.** The experimental design with the number and subdivision of animals and timing of sacrifice

|                                                 |       | Time line                 |                                                  |                                               |                         |                                                           |                |
|-------------------------------------------------|-------|---------------------------|--------------------------------------------------|-----------------------------------------------|-------------------------|-----------------------------------------------------------|----------------|
| Program                                         | group | Step 1                    | Step 2                                           | Step 3                                        | Step 4                  | Step 5                                                    | Number of mice |
| Experiment 1: VCD induced ovary failure         | 1     | VCD treatment for 14 days | Behavior test on Day 15                          | Sacrifice on Day 16                           |                         |                                                           | 9              |
|                                                 | 2     | Oil treatment for 14 days |                                                  |                                               |                         |                                                           | 6              |
|                                                 | 3     | VCD treatment for 14 days | Behavior test on Day 30                          | Sacrifice on Day 31                           |                         |                                                           | 7              |
|                                                 | 4     | Oil treatment for 14 days |                                                  |                                               |                         |                                                           | 11             |
|                                                 | 5     | VCD treatment for 14 days | Behavior test on Day 60                          | Blood taken, Sacrifice, Ovary taken on Day 61 |                         |                                                           | 7              |
|                                                 | 6     | Oil treatment for 14 days |                                                  |                                               |                         |                                                           | 5              |
|                                                 | 7     | VCD treatment for 14 days | Estrous cycle patterns monitoring on Day55-Day60 | Behavior test on Day 160                      | Sacrifice on Day 161    |                                                           | 6              |
|                                                 | 8     | Oil treatment for 14 days |                                                  |                                               |                         |                                                           | 4              |
| Experiment 2: Kaempferol treatment on VCD model | 1     | No treatment for 14 Days  | No treatment for 31 Days                         | No treatment for 14 days                      | Behavior test on Day 60 | Blood taken, Sacrifice, Ovary/Hippocampus taken on Day 61 | 13             |
|                                                 | 2     | VCD treatment for 14 days | No treatment for 31 Days                         | No treatment for 14 days                      |                         |                                                           | 11             |
|                                                 | 3     | VCD treatment for 14 days | No treatment for 31 Days                         | Kaempferol treatment for 14 days              |                         |                                                           | 10             |

|                                                                              |   |                                           |                               |                                              |                                     |                                                                       |    |
|------------------------------------------------------------------------------|---|-------------------------------------------|-------------------------------|----------------------------------------------|-------------------------------------|-----------------------------------------------------------------------|----|
| Experiment 3:<br>Kaempferol<br>treatment on aged<br>mice exposed to<br>CUMS  | 1 | Female Mice<br>grow up to 11<br>month old | No treatment for 42<br>Days   | No treatment for 14<br>Days                  | Behavior test on Day 57             | Sacrifice                                                             | 6  |
|                                                                              | 2 |                                           | CUMS treatment for<br>42 Days | CUMS treatment for<br>14 Days                |                                     |                                                                       | 4  |
|                                                                              | 3 |                                           | CUMS treatment for<br>42 Days | CUMS and kaempferol<br>treatment for 14 Days |                                     |                                                                       | 5  |
| Experiment 4:<br>Kaempferol<br>treatment on VCD<br>model in Sirt3-KO<br>mice | 1 | WT                                        | VCD treatment for<br>14 days  | No treatment for 32<br>Days                  | No treatment for 14<br>days         | Behavior test on Day 60,<br>Sacrifice, Hippocampus<br>taken on Day 61 | 11 |
|                                                                              | 2 | Sirt3-KO                                  | VCD treatment for<br>14 days  | No treatment for 32<br>Days                  | No treatment for 14<br>days         |                                                                       | 11 |
|                                                                              | 3 | WT                                        | VCD treatment for<br>14 days  | No treatment for 32<br>Days                  | Kaempferol treatment<br>for 14 days |                                                                       | 11 |
|                                                                              | 4 | Sirt3-KO                                  | VCD treatment for<br>14 days  | No treatment for 32<br>Days                  | Kaempferol treatment<br>for 14 days |                                                                       | 10 |
| Experiment 5: Sirt3<br>over expression on<br>VCD model                       | 1 | VCD treatment<br>for 14 days              | No treatment for 32<br>Days   | AAV-EGFP injection                           | No treatment for 14<br>days         | Behavior test on Day 60,<br>Sacrifice, Hippocampus<br>taken on Day 61 | 12 |
|                                                                              | 2 | VCD treatment<br>for 14 days              | No treatment for 32<br>Days   | AAV-Sirt3-OE injection                       | No treatment for 14<br>days         |                                                                       | 13 |
|                                                                              | 3 | VCD treatment<br>for 14 days              | No treatment for 32<br>Days   | AAV-EGFP injection                           | No treatment for 14<br>days         |                                                                       | 12 |
|                                                                              | 4 | VCD treatment<br>for 14 days              | No treatment for 32<br>Days   | AAV-Sirt3-OE injection                       | No treatment for 14<br>days         |                                                                       | 13 |
